# Supplementary material for: Surfactin-inspired arginine- and lysine-rich peptides inhibit human insulin aggregation and prevent amyloid-induced cytotoxicity
Source: Royal Society of Chemistry journal article supplement (doi:10.1039/d5tb01952d), 2025-12-16
Supplement: d5tb01952d1.pdf [file d5tb01952d1.pdf]

## Supplementary Info

### **Surfactin-inspired arginine- and lysine-rich peptides inhibit human insulin aggregation and prevent amyloid-induced cytotoxicity**

Chinmaya Panda <sup>1</sup>, Sachin Kumar <sup>2</sup>, Sharad Gupta <sup>3</sup>, Lalit M Pandey <sup>1\*</sup>

<sup>1</sup>Bio-interface & Environmental Engineering Lab,  
Department of Biosciences and Bioengineering,  
Indian Institute of Technology Guwahati, Assam, 781039, India.

<sup>2</sup>Viral Immunology Lab,  
Department of Biosciences and Bioengineering,  
Indian Institute of Technology Guwahati, Assam, 781039, India.

<sup>3</sup>Biology of Amyloid Systems Lab,  
Department of Biological Sciences and Engineering,  
Indian Institute of Technology Gandhinagar, Gujarat, 382355, India.

\*Corresponding author: Tel. +91-361-258-3201; Fax +91-361-258-2249

Email address: [lalitpandey@iitg.ac.in](mailto:lalitpandey@iitg.ac.in)

**A**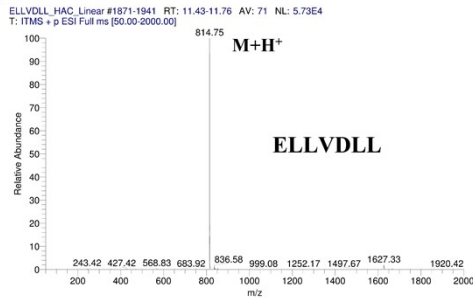**B**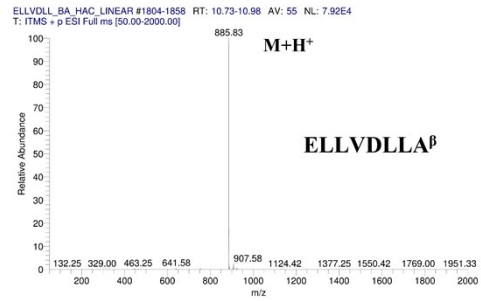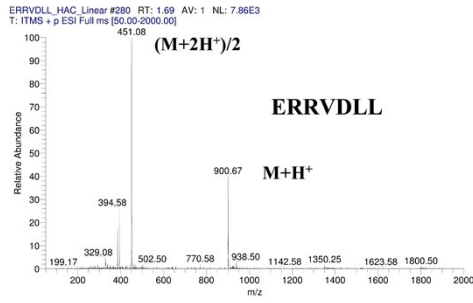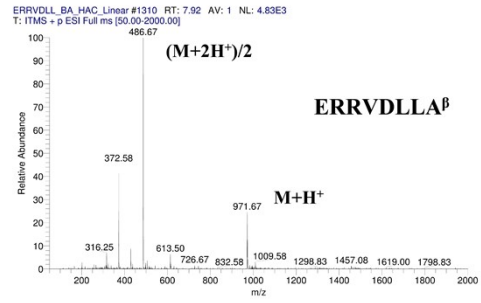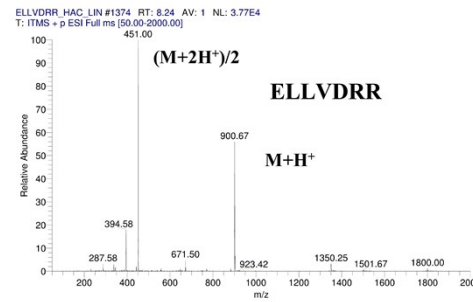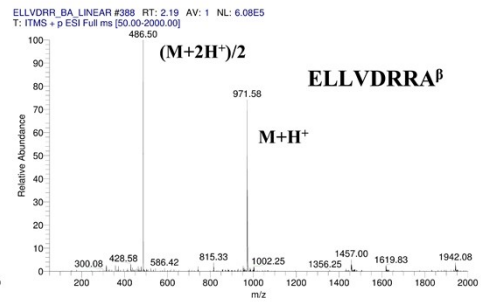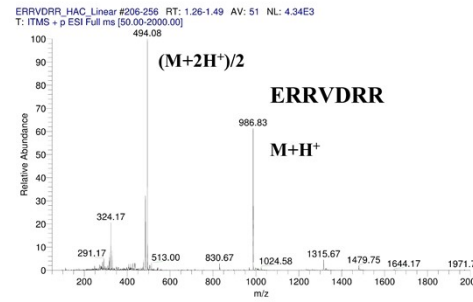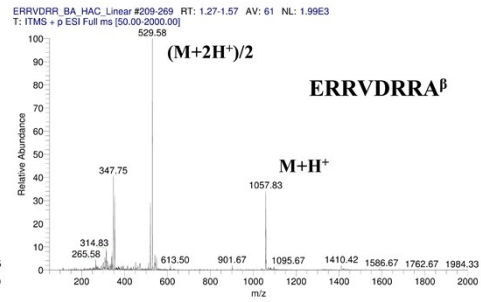

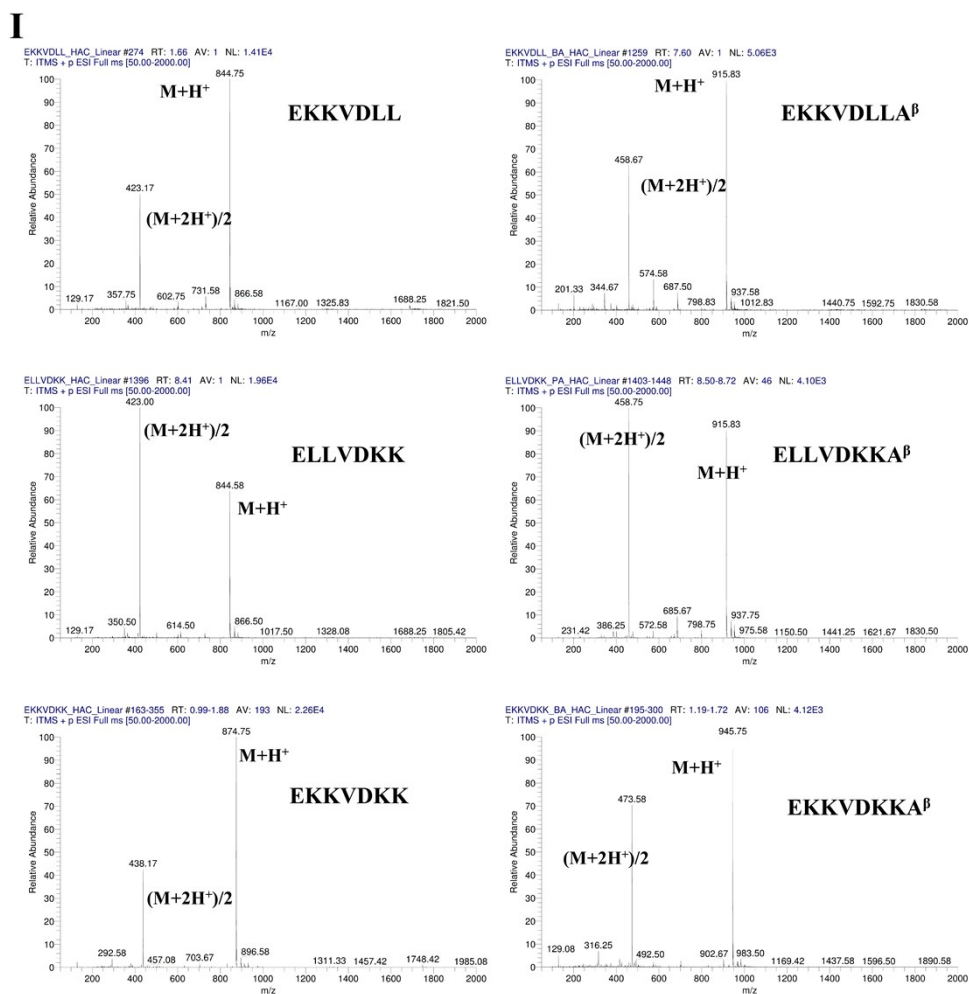

**Fig. S1.** MS spectra of all fourteen synthesized peptides showing respective masses.

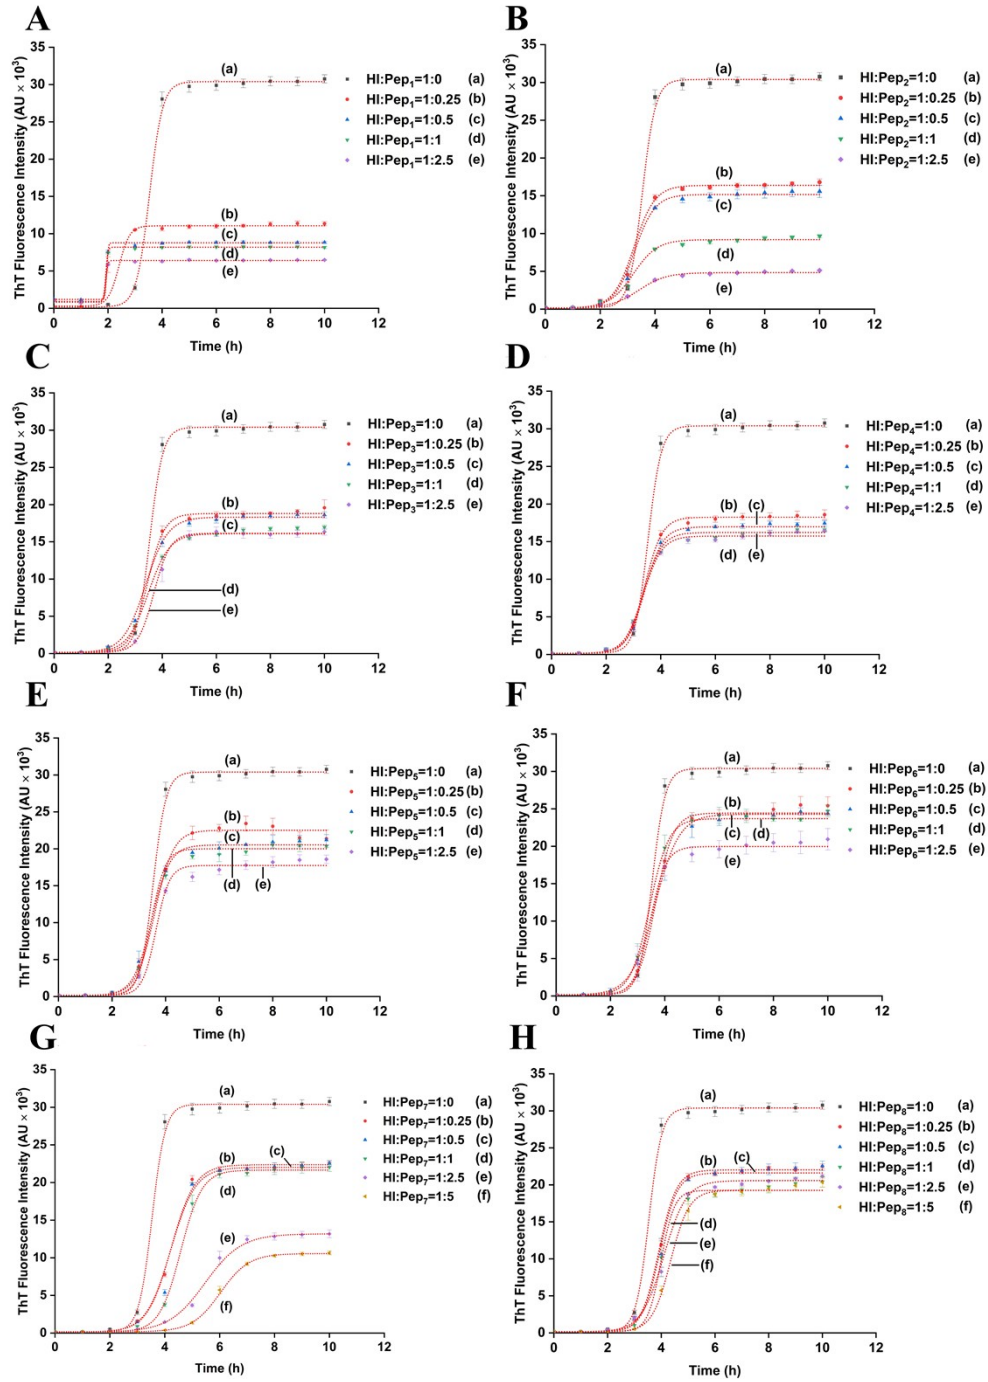

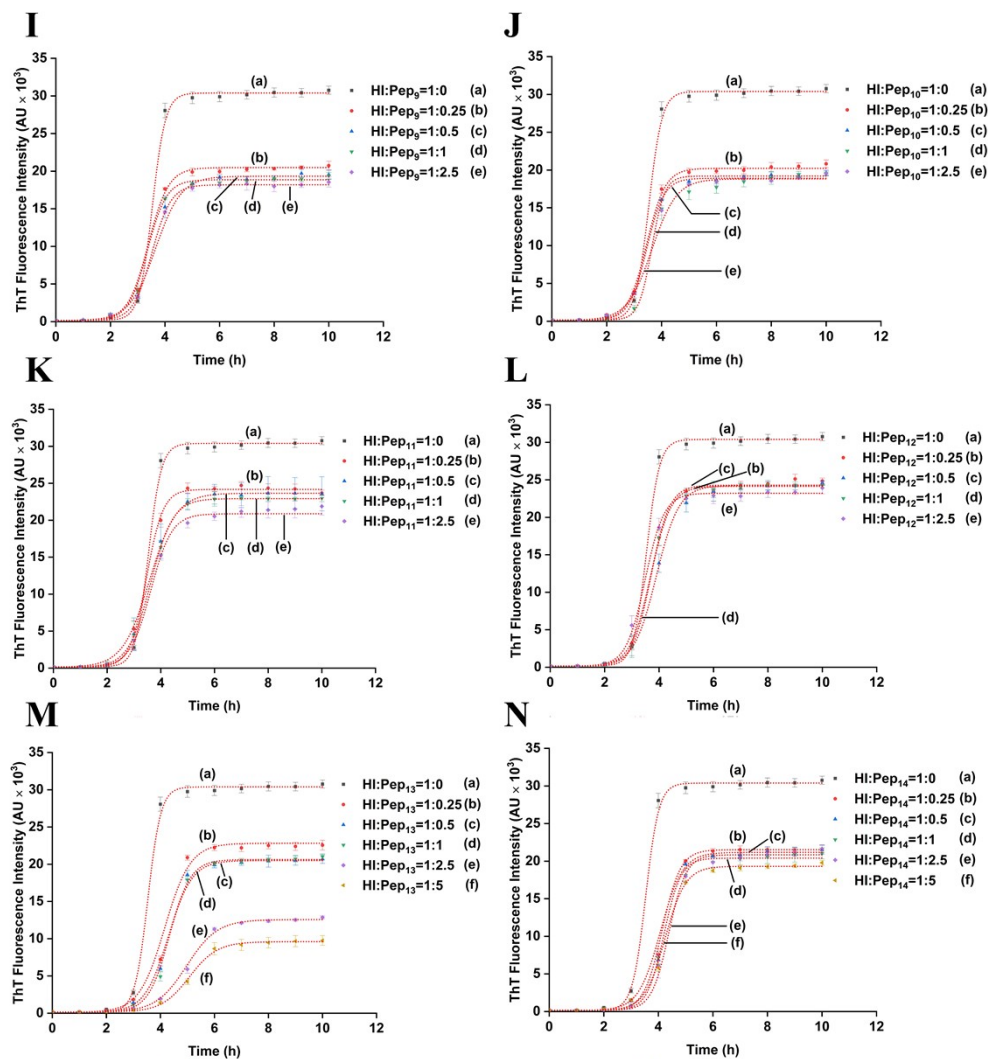

**Fig. S2.** Time-course ThT fluorescence kinetics of HI at different molar ratios of HI to all fourteen peptides under aggregating conditions of pH 1.6 and 60 °C. Red dotted lines represent the fitted (modified Boltzmann equation) data. Error bars indicate standard deviations derived from three independent experiments.

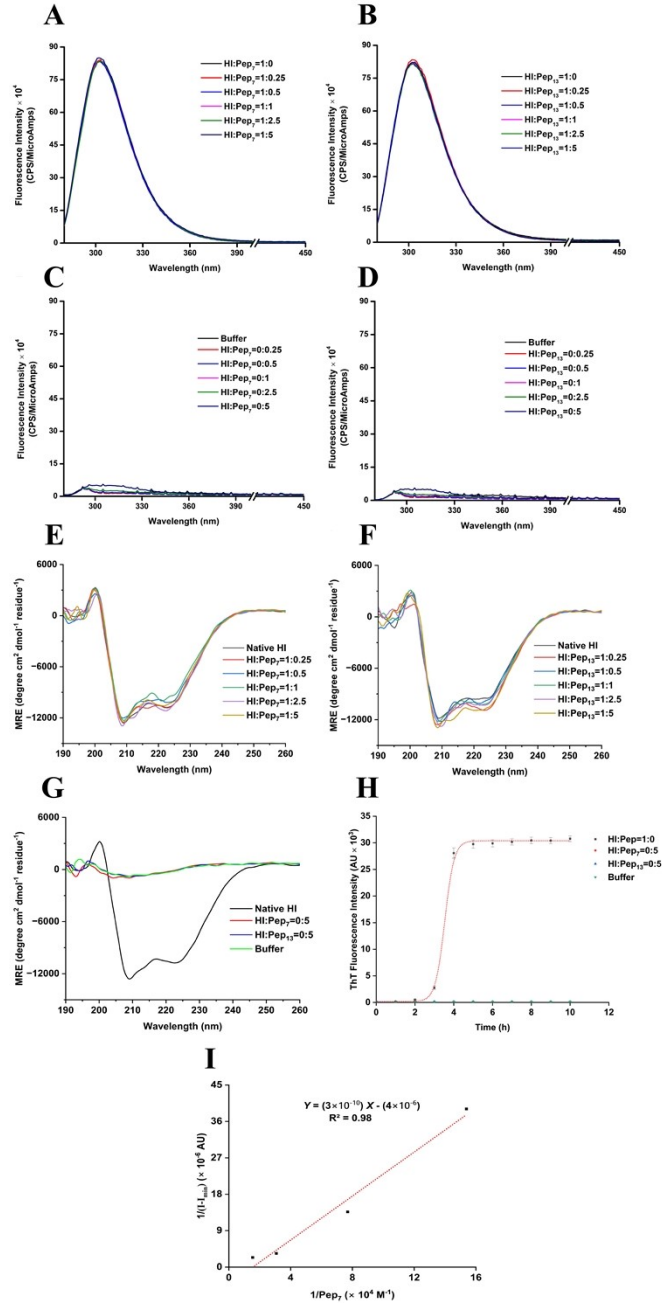

**Fig. S3. (A and B).** Intrinsic Tyr fluorescence spectra over  $\lambda_{em} = 280-450$  nm with  $\lambda_{ex} = 268$  nm of HI with or without different molar ratios of Pep<sub>7</sub> and Pep<sub>13</sub> mixed and incubated at non-aggregation (pH 1.6, and RT) conditions. **(C and D).** Intrinsic Tyr fluorescence spectra of different molar ratios of only Pep<sub>7</sub> and Pep<sub>13</sub> without HI. **(E and F).** Circular dichroism spectra for HI with or without incubation having different molar ratios of Pep<sub>7</sub> and Pep<sub>13</sub> under non-aggregation conditions. **(G and H).** CD **(G)** and ThT kinetics spectra **(H)** of native HI, Pep<sub>7</sub>, and Pep<sub>13</sub> at their highest usage concentrations, and buffer component. **(I).** Fitting of the fluorimetry intensity data of Pep<sub>7</sub> and HI using the Benesi-Hildebrand equation ( $y = (3 \times 10^{-10})x - (4 \times 10^{-6})$ ,  $R^2 = 0.98$ ), where the binding coefficient ( $K_a$ ) was determined to be  $(6.28 \pm 0.15) \times 10^3 \text{ M}^{-1}$ .

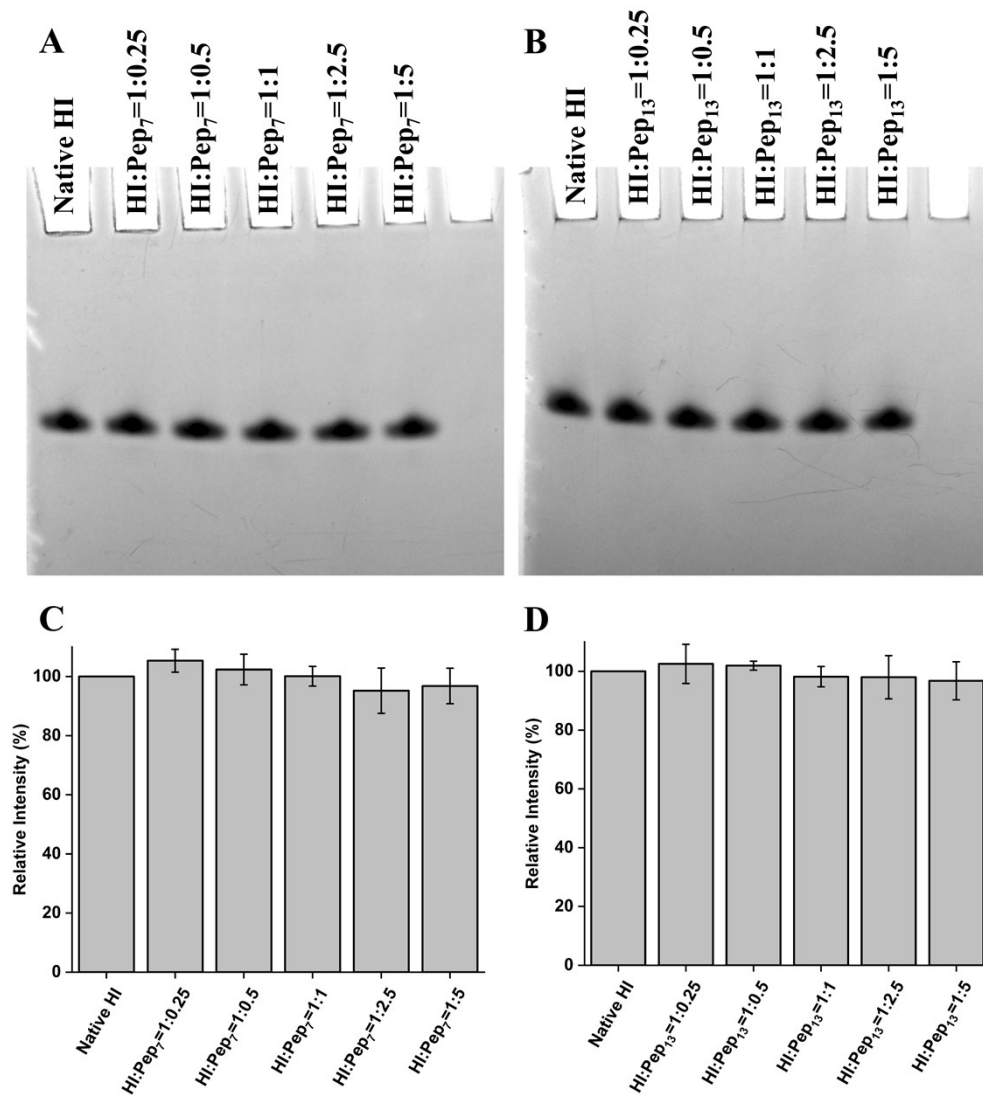

**Fig S4. (A and B).** Native PAGE bands of HI with or without different molar ratios of Pep<sub>7</sub> and Pep<sub>13</sub> under non-aggregation conditions. One representative image from the n=3 is shown here. **(C and D).** The relative band intensities of the native PAGE gels were quantified using ImageJ.

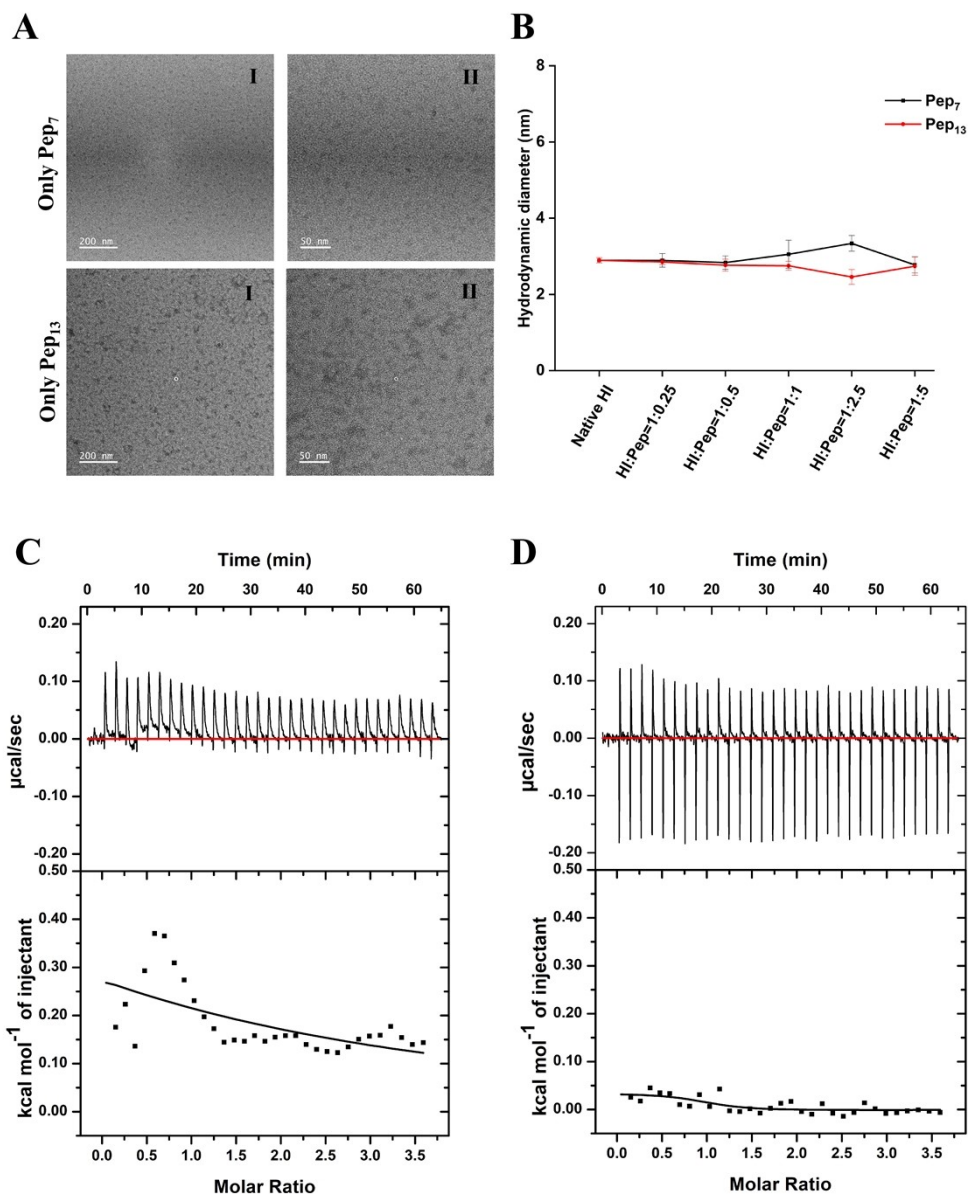

**Fig S5. (A).** TEM images of only Pep<sub>7</sub> and Pep<sub>13</sub>. Panels I and II contain images at scales of 200 nm and 50 nm, respectively. **(B).** Hydrodynamic diameter of HI with or without different molar ratios of Pep<sub>7</sub> and Pep<sub>13</sub> under non-aggregation conditions measured using DLS. **(C and D).** ITC spectra of Pep<sub>1</sub> **(C)** and Pep<sub>2</sub> **(D)** with HI in 32 injections, representing the endothermic nature of the interaction for Pep<sub>1</sub>.



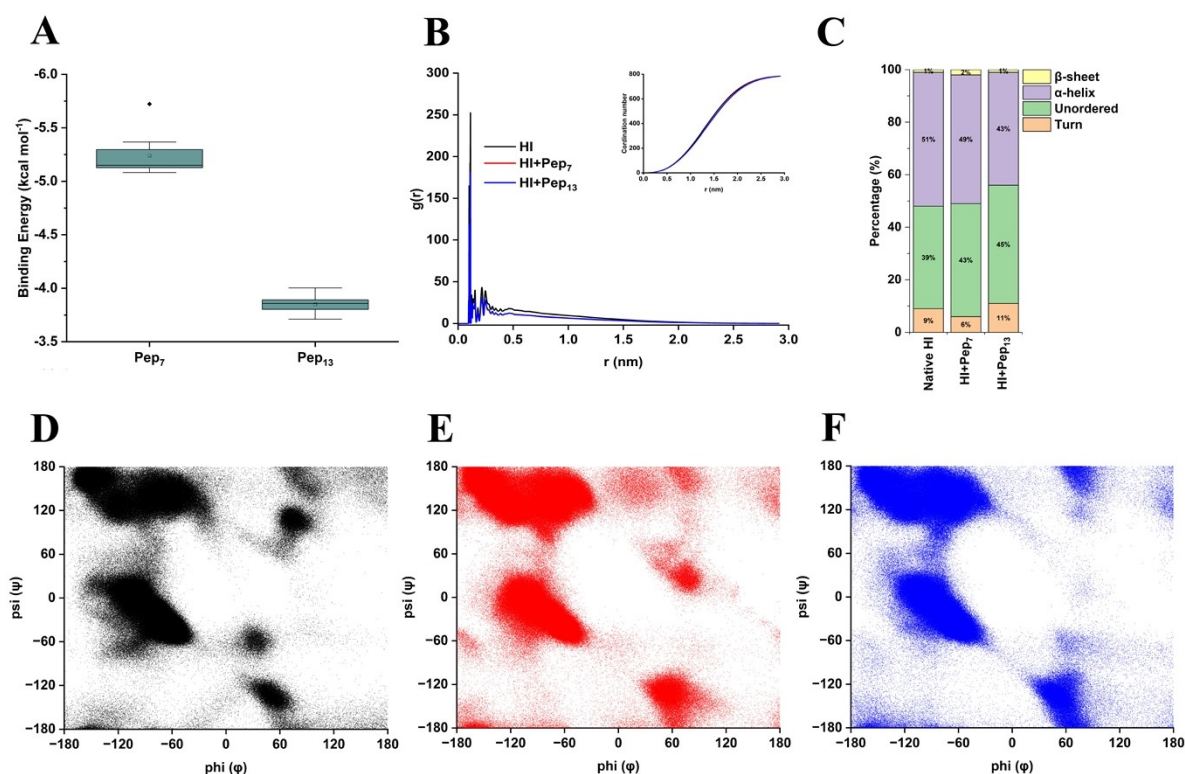

**Fig. S6.** (A). Binding energy scores of Pep<sub>7</sub> and Pep<sub>13</sub> with monomeric HI obtained through Autodock Vina. (B). Radial distribution function (RDF) and corresponding coordination number (inset) obtained from the MD simulation for HI, HI+Pep<sub>7</sub>, and HI+Pep<sub>13</sub>, indicating no significant change in the presence of the peptides. (C). Secondary structural analysis of HI, HI+Pep<sub>7</sub>, and HI+Pep<sub>13</sub>, obtained from the MD trajectories. (D-F). Ramachandran plot obtained from the MD simulation of HI, HI+Pep<sub>7</sub>, and HI+Pep<sub>13</sub>.

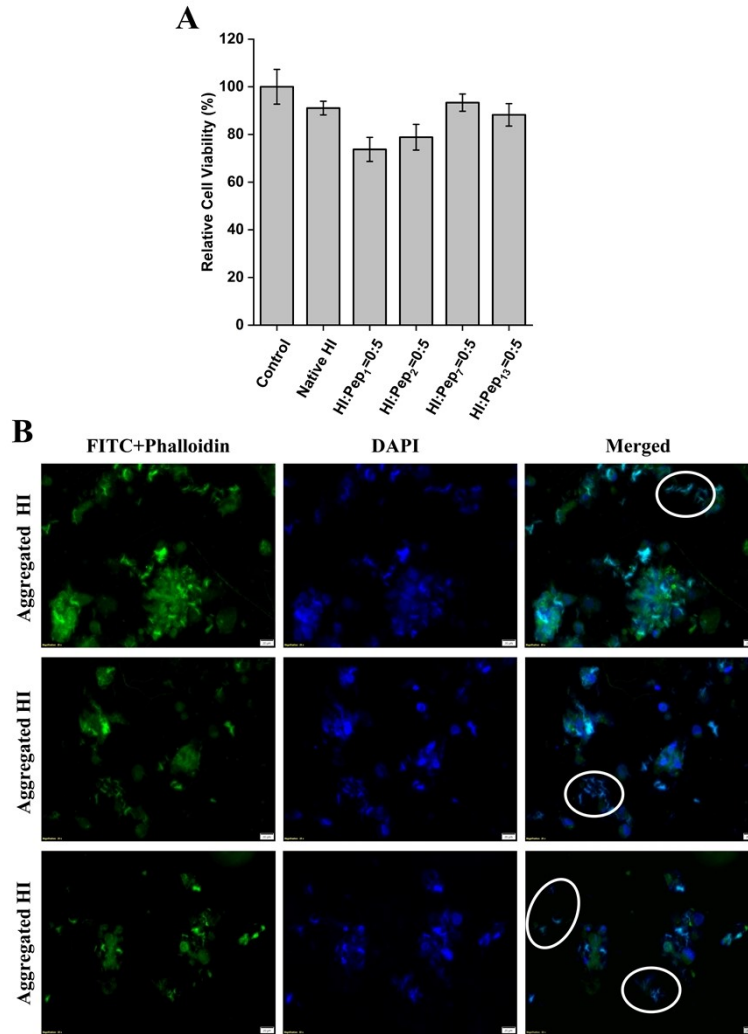

**Fig. S7. (A).** MTT assay representing the cell viability of HepG2 cells incubated with only Pep<sub>1</sub>, Pep<sub>2</sub>, Pep<sub>7</sub> and Pep<sub>13</sub>. **(B).** HepG2 cells incubated with aggregated HI samples, stained with FITC-Phalloidin and nuclear stain DAPI, represented at a scale bar of 20  $\mu$ m. Aggregated HI samples were marked with white circles.

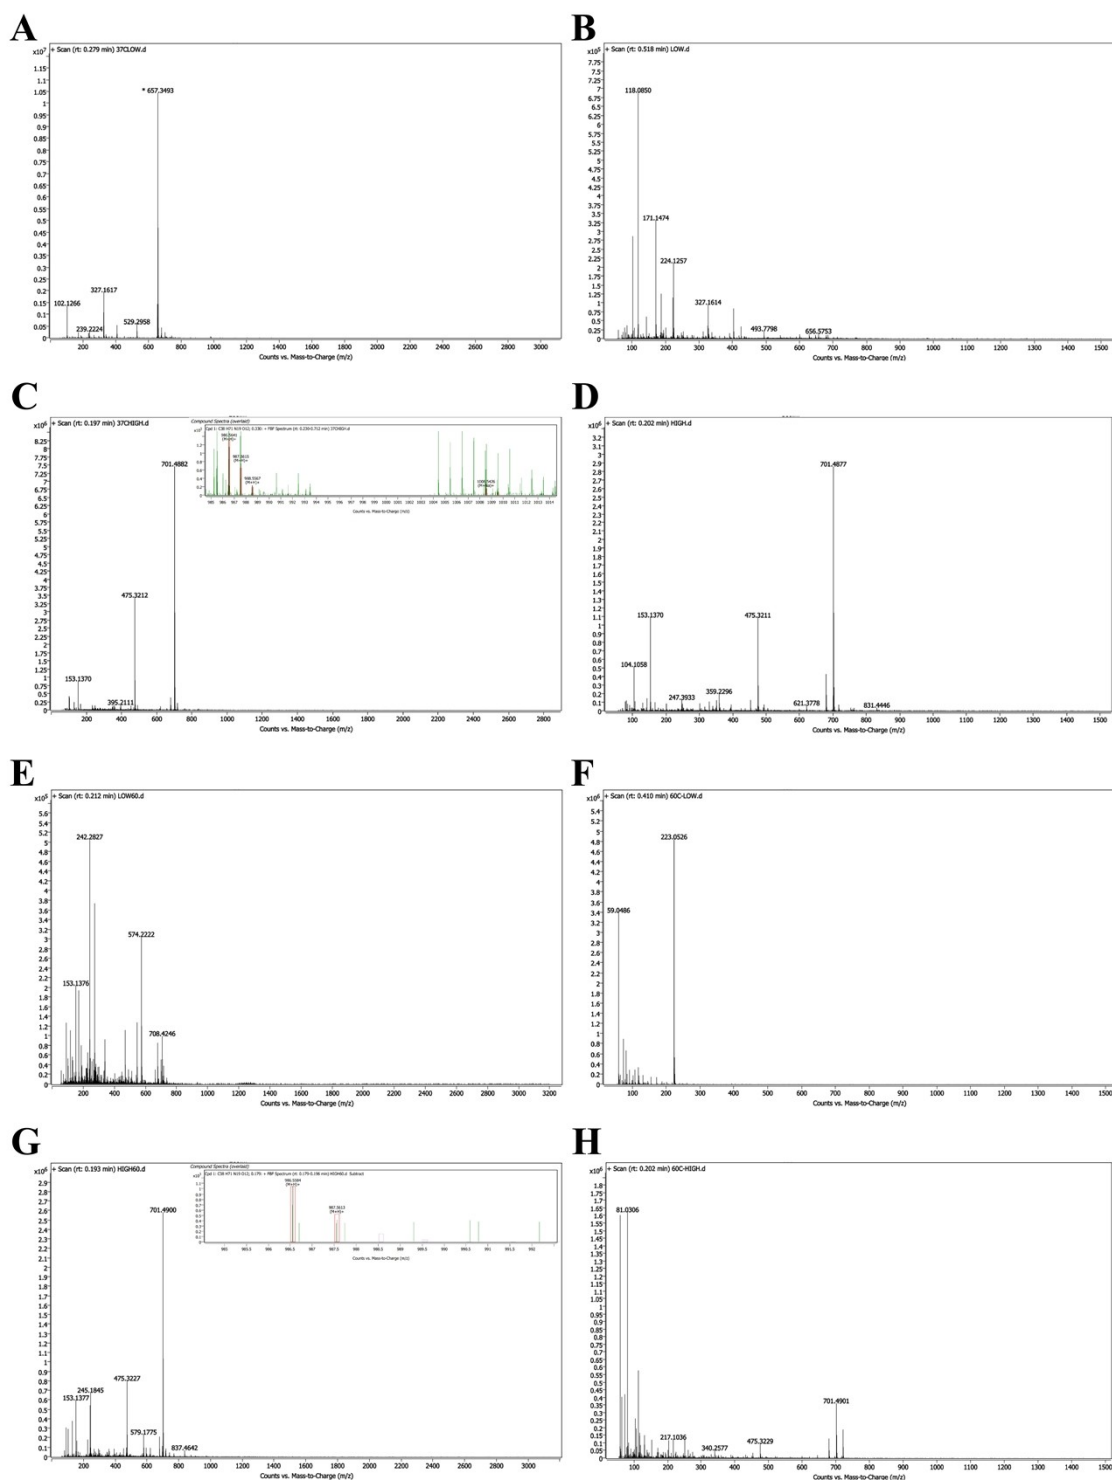

**Fig. S8.** The degradation pattern of Pep<sub>7</sub>, observed using HR-MS under various conditions over 3 and 7 days. Temperature 37 °C and pH 1.6: for day 3 (**A**), and day 7 (**B**). Temperature 37 °C and pH 7.4: for day 3 (**C**) and day 7 (**D**). Temperature 60 °C and pH 1.6: for day 3 (**E**), and day 7 (**F**). Temperature 60 °C and pH 7.4: for day 3 (**G**) and day 7 (**H**). The inset figures in (**C**) and (**G**) represent the target screening of Pep<sub>7</sub> (C<sub>38</sub>H<sub>71</sub>N<sub>19</sub>O<sub>12</sub>) in the HR-MS spectra, representing a peak at 986.5 Da, corresponding to the M+H<sup>+</sup> peak.

**Table S1.** The sequence of all fourteen peptides and other theoretical characteristics predicted using www.pep-calc.com, www.peptide2.com, and the Bachem peptide calculator. LC-MS reported the mass of the fourteen peptides.

| Sl. No.                                     | Peptide sequence                                                      | Theoretical molecular mass (Da) | Theoretical hydrophobicity | Theoretical basicity and acidity | Observed molecular mass (Da)                   |
|---------------------------------------------|-----------------------------------------------------------------------|---------------------------------|----------------------------|----------------------------------|------------------------------------------------|
| 1                                           | ELLVDLL<br>(original sequence)<br>(Pep <sub>1</sub> )                 | 813.48                          | 71.43%                     | Acidic: 28.57%<br>Basic: 0%      | M+H <sup>+</sup> = 814.75                      |
| 2                                           | ELLVDLLA <sup>β</sup> (Ester replaced with βA)<br>(Pep <sub>2</sub> ) | 884.52                          | 75%                        | Acidic: 25%<br>Basic: 0%         | M+H <sup>+</sup> = 885.83                      |
| <b>D-Leucine replaced with Arginine (R)</b> |                                                                       |                                 |                            |                                  |                                                |
| 3                                           | ERRVDLL<br>(Pep <sub>3</sub> )                                        | 899.52                          | 42.86%                     | Acidic: 28.57%<br>Basic: 28.57%  | M = 900.67<br>(M+2H <sup>+</sup> )/2 = 451.08  |
| 4                                           | ERRVDLLA <sup>β</sup><br>(Pep <sub>4</sub> )                          | 970.56                          | 50%                        | Acidic: 25%<br>Basic: 25%        | M = 971.67<br>(M+2H <sup>+</sup> )/2 = 486.67  |
| 5                                           | ELLVDRR<br>(Pep <sub>5</sub> )                                        | 899.52                          | 42.86%                     | Acidic: 28.57%<br>Basic: 28.57%  | M = 900.67<br>(M+2H <sup>+</sup> )/2 = 451.00  |
| 6                                           | ELLVDRRA <sup>β</sup><br>(Pep <sub>6</sub> )                          | 970.56                          | 50%                        | Acidic: 25%<br>Basic: 25%        | M = 971.58<br>(M+2H <sup>+</sup> )/2 = 486.50  |
| 7                                           | ERRVDRR<br>(Pep <sub>7</sub> )                                        | 985.55                          | 14.29%                     | Acidic: 28.57%<br>Basic: 57.14%  | M = 986.83<br>(M+2H <sup>+</sup> )/2 = 494.08  |
| 8                                           | ERRVDRRA <sup>β</sup><br>(Pep <sub>8</sub> )                          | 1056.59                         | 25%                        | Acidic: 25%<br>Basic: 50%        | M = 1057.83<br>(M+2H <sup>+</sup> )/2 = 529.58 |
| <b>D-Leucine replaced with Lysine (K)</b>   |                                                                       |                                 |                            |                                  |                                                |
| 9                                           | EKKVDLL<br>(Pep <sub>9</sub> )                                        | 843.51                          | 42.86%                     | Acidic: 28.57%<br>Basic: 28.57%  | M = 844.75<br>(M+2H <sup>+</sup> )/2 = 423.17  |
| 10                                          | EKKVDLLA <sup>β</sup><br>(Pep <sub>10</sub> )                         | 914.54                          | 50%                        | Acidic: 25%<br>Basic: 25%        | M = 915.83<br>(M+2H <sup>+</sup> )/2 = 458.67  |
| 11                                          | ELLVDKK<br>(Pep <sub>11</sub> )                                       | 843.51                          | 42.86%                     | Acidic: 28.57%<br>Basic: 28.57%  | M = 844.58<br>(M+2H <sup>+</sup> )/2 = 423.00  |
| 12                                          | ELLVDKKA <sup>β</sup>                                                 | 914.54                          | 50%                        | Acidic: 25%<br>Basic: 25%        | M = 915.83                                     |

|           |                                                    |        |        |                                 |                                     |
|-----------|----------------------------------------------------|--------|--------|---------------------------------|-------------------------------------|
|           | <b>(Pep<sub>12</sub>)</b>                          |        |        |                                 | $(M+2H^+)/2 = 458.75$               |
| <b>13</b> | EKKVDKK<br><b>(Pep<sub>13</sub>)</b>               | 873.53 | 14.29% | Acidic: 28.57%<br>Basic: 57.14% | M = 874.75<br>$(M+2H^+)/2 = 438.17$ |
| <b>14</b> | EKKVDKKA <sup>β</sup><br><b>(Pep<sub>14</sub>)</b> | 944.57 | 25%    | Acidic: 25%<br>Basic: 50%       | M = 945.75<br>$(M+2H^+)/2 = 473.58$ |

**Table S2.** Lag time, rate, and the ThT intensity maxima of all fourteen peptides at four different concentrations.

| Name                    | HI:Pep=1:0.25        |                          |                                                 | HI:Pep=1:0.5         |                          |                                                 | HI:Pep=1:1           |                          |                                                 | HI:Pep=1:2.5         |                          |                                                 |
|-------------------------|----------------------|--------------------------|-------------------------------------------------|----------------------|--------------------------|-------------------------------------------------|----------------------|--------------------------|-------------------------------------------------|----------------------|--------------------------|-------------------------------------------------|
|                         | $t_{\text{lag}}$ (h) | Rate ( $\text{h}^{-1}$ ) | $I_{\text{max}}$<br>( $\text{AU} \times 10^3$ ) | $t_{\text{lag}}$ (h) | Rate ( $\text{h}^{-1}$ ) | $I_{\text{max}}$<br>( $\text{AU} \times 10^3$ ) | $t_{\text{lag}}$ (h) | Rate ( $\text{h}^{-1}$ ) | $I_{\text{max}}$<br>( $\text{AU} \times 10^3$ ) | $t_{\text{lag}}$ (h) | Rate ( $\text{h}^{-1}$ ) | $I_{\text{max}}$<br>( $\text{AU} \times 10^3$ ) |
| <b>Pep<sub>1</sub></b>  | $1.48 \pm 0.12$      | $3.91 \pm 0.4$           | $11.10 \pm 0.20$                                | $1.10 \pm 0.02$      | $4.24 \pm 0.4$           | $8.78 \pm 0.06$                                 | $1.19 \pm 0.08$      | $5.45 \pm 0.9$           | $8.14 \pm 0.07$                                 | $1.15 \pm 0.05$      | $5.42 \pm 0.3$           | $6.43 \pm 0.03$                                 |
| <b>Pep<sub>2</sub></b>  | $2.63 \pm 0.10$      | $2.96 \pm 0.1$           | $16.49 \pm 0.24$                                | $2.62 \pm 0.15$      | $2.84 \pm 0.1$           | $15.17 \pm 0.76$                                | $2.30 \pm 0.07$      | $2 \pm 0.9$              | $9.38 \pm 0.19$                                 | $2.02 \pm 0.18$      | $1.47 \pm 0.2$           | $5 \pm 0.36$                                    |
| <b>Pep<sub>3</sub></b>  | $2.83 \pm 0.02$      | $3.25 \pm 0.5$           | $18.95 \pm 0.43$                                | $2.65 \pm 0.07$      | $2.37 \pm 0.1$           | $18.51 \pm 0.39$                                | $2.67 \pm 0.02$      | $2.37 \pm 0.1$           | $16.55 \pm 0.28$                                | $3.17 \pm 0.1$       | $3.34 \pm 0.6$           | $16.44 \pm 0.27$                                |
| <b>Pep<sub>4</sub></b>  | $2.82 \pm 0.05$      | $3.12 \pm 0.1$           | $18.3 \pm 0.51$                                 | $2.83 \pm 0.06$      | $3.08 \pm 0.2$           | $17.28 \pm 0.20$                                | $2.54 \pm 0.07$      | $2.36 \pm 0.2$           | $16.24 \pm 0.28$                                | $2.59 \pm 0.04$      | $2.49 \pm 0.1$           | $16.02 \pm 0.22$                                |
| <b>Pep<sub>5</sub></b>  | $2.98 \pm 0.10$      | $3.08 \pm 0.3$           | $22.2 \pm 0.55$                                 | $2.67 \pm 0.14$      | $2.55 \pm 0.2$           | $20.77 \pm 0.46$                                | $2.78 \pm 0.01$      | $2.63 \pm 0.2$           | $20.30 \pm 0.44$                                | $2.78 \pm 0.20$      | $2.68 \pm 0.7$           | $18.10 \pm 0.64$                                |
| <b>Pep<sub>6</sub></b>  | $2.91 \pm 0.05$      | $2.64 \pm 0.2$           | $25.12 \pm 0.71$                                | $2.75 \pm 0.11$      | $2.29 \pm 0.1$           | $24.33 \pm 0.31$                                | $2.79 \pm 0.15$      | $2.94 \pm 0.2$           | $24.12 \pm 0.30$                                | $2.72 \pm 0.22$      | $3.23 \pm 0.8$           | $20.28 \pm 1.43$                                |
| <b>Pep<sub>7</sub></b>  | $3.51 \pm 0.05$      | $3.01 \pm 0.2$           | $22.23 \pm 0.37$                                | $3.69 \pm 0.04$      | $2.95 \pm 0.1$           | $22.28 \pm 0.23$                                | $3.89 \pm 0.05$      | $2.87 \pm 0.1$           | $21.83 \pm 0.58$                                | $4.42 \pm 0.01$      | $1.89 \pm 0.1$           | $13.22 \pm 0.46$                                |
| <b>Pep<sub>8</sub></b>  | $3.35 \pm 0.09$      | $3.35 \pm 0.3$           | $22.11 \pm 0.28$                                | $3.37 \pm 0.08$      | $3.1 \pm 0.1$            | $22.17 \pm 0.56$                                | $3.30 \pm 0.18$      | $2.91 \pm 0.3$           | $19.86 \pm 0.55$                                | $3.31 \pm 0.06$      | $2.43 \pm 0.1$           | $20.72 \pm 0.09$                                |
| <b>Pep<sub>9</sub></b>  | $2.79 \pm 0.04$      | $3.04 \pm 0.1$           | $20.48 \pm 0.22$                                | $2.91 \pm 0.07$      | $2.94 \pm 0.5$           | $19.3 \pm 0.35$                                 | $2.75 \pm 0.13$      | $2.94 \pm 0.3$           | $18.96 \pm 0.22$                                | $2.9 \pm 0.05$       | $2.9 \pm 0.2$            | $18.26 \pm 0.50$                                |
| <b>Pep<sub>10</sub></b> | $2.85 \pm 0.04$      | $3.12 \pm 0.1$           | $20.33 \pm 0.49$                                | $2.83 \pm 0.03$      | $2.91 \pm 0.2$           | $19.28 \pm 0.27$                                | $2.65 \pm 0.06$      | $3.02 \pm 0.5$           | $18.99 \pm 0.43$                                | $2.82 \pm 0.01$      | $2.59 \pm 0.1$           | $18.97 \pm 0.10$                                |
| <b>Pep<sub>11</sub></b> | $2.78 \pm 0.12$      | $2.95 \pm 0.1$           | $24.31 \pm 0.16$                                | $2.78 \pm 0.28$      | $2.57 \pm 0.6$           | $23.59 \pm 1.99$                                | $2.75 \pm 0.25$      | $2.41 \pm 0.4$           | $22.90 \pm 0.30$                                | $2.73 \pm 0.19$      | $2.26 \pm 0.4$           | $21.43 \pm 1.07$                                |
| <b>Pep<sub>12</sub></b> | $2.97 \pm 0.08$      | $2.75 \pm 0.1$           | $24.57 \pm 0.41$                                | $2.95 \pm 0.16$      | $2.17 \pm 0.3$           | $24.32 \pm 0.29$                                | $3.03 \pm 0.26$      | $3.02 \pm 0.6$           | $24.20 \pm 0.34$                                | $2.69 \pm 0.12$      | $2.56 \pm 0.1$           | $23.43 \pm 0.14$                                |
| <b>Pep<sub>13</sub></b> | $3.56 \pm 0.02$      | $3.10 \pm 0.1$           | $22.48 \pm 0.45$                                | $3.59 \pm 0.01$      | $2.92 \pm 0.1$           | $20.56 \pm 0.57$                                | $3.69 \pm 0.06$      | $2.78 \pm 0.1$           | $20.84 \pm 0.43$                                | $4 \pm 0.03$         | $1.92 \pm 0.1$           | $12.73 \pm 0.18$                                |
| <b>Pep<sub>14</sub></b> | $3.54 \pm 0.06$      | $3.13 \pm 0.2$           | $21.61 \pm 0.41$                                | $3.55 \pm 0.05$      | $3.06 \pm 0.2$           | $21.27 \pm 0.52$                                | $3.48 \pm 0.06$      | $2.57 \pm 0.3$           | $20.81 \pm 0.85$                                | $3.54 \pm 0.2$       | $2.55 \pm 0.4$           | $21.19 \pm 0.54$                                |

**Table S3.** ThT  $I_{\max}$ , lag time, and rate of aggregation of HI containing different molar ratios of Pep<sub>7</sub> and Pep<sub>13</sub>.

| Sample                       | Relative inhibition in ThT <sub>max</sub> with no peptide control (%) | HI fibrillation lag time (h) | Relative increase in lag time with no peptide control (%) | Rate of fibrillation (h <sup>-1</sup> ) | Relative decrease in rate with no peptide control (%) |
|------------------------------|-----------------------------------------------------------------------|------------------------------|-----------------------------------------------------------|-----------------------------------------|-------------------------------------------------------|
| HI:Pep=1:0                   | NA                                                                    | 2.81 ± 0.02                  | NA                                                        | 5.79 ± 0.1                              | NA                                                    |
| HI:Pep <sub>7</sub> =1:0.25  | 26.67                                                                 | 3.51 ± 0.05                  | 25.06                                                     | 3.01 ± 0.22                             | 48.02                                                 |
| HI:Pep <sub>7</sub> =1:0.5   | 26.49                                                                 | 3.69 ± 0.04                  | 31.34                                                     | 2.95 ± 0.12                             | 48.89                                                 |
| HI:Pep <sub>7</sub> =1:1     | 28                                                                    | 3.89 ± 0.05                  | 38.63                                                     | 2.87 ± 0.15                             | 50.38                                                 |
| HI:Pep <sub>7</sub> =1:2.5   | 56.39                                                                 | 4.42 ± 0.01                  | 57.59                                                     | 1.89 ± 0.12                             | 67.33                                                 |
| HI:Pep <sub>7</sub> =1:5     | 64.86                                                                 | 4.92 ± 0.07                  | 75.17                                                     | 1.90 ± 0.11                             | 67.11                                                 |
| HI:Pep <sub>13</sub> =1:0.25 | 25.85                                                                 | 3.56 ± 0.02                  | 26.87                                                     | 3.1 ± 0.11                              | 46.41                                                 |
| HI:Pep <sub>13</sub> =1:0.5  | 32.18                                                                 | 3.59 ± 0.01                  | 27.79                                                     | 2.92 ± 0.04                             | 49.41                                                 |
| HI:Pep <sub>13</sub> =1:1    | 31.26                                                                 | 3.69 ± 0.06                  | 31.64                                                     | 2.75 ± 0.1                              | 52.43                                                 |
| HI:Pep <sub>13</sub> =1:2.5  | 58.01                                                                 | 4 ± 0.03                     | 42.61                                                     | 1.92 ± 0.06                             | 66.69                                                 |
| HI:Pep <sub>13</sub> =1:5    | 68.04                                                                 | 4.08 ± 0.03                  | 45.50                                                     | 2.02 ± 0.1                              | 65.01                                                 |

**Table S4.** Residue-specific binding interaction between Pep<sub>7</sub> and Pep<sub>13</sub> and HI.

|                   |                                        | Interacting Residues                                                                         |                                                            |
|-------------------|----------------------------------------|----------------------------------------------------------------------------------------------|------------------------------------------------------------|
|                   | Binding energy (kJ mol <sup>-1</sup> ) | H-bonds                                                                                      | Electrostatic interactions                                 |
| Pep <sub>7</sub>  | -23.94                                 | Cluster 1: Gly <sup>A1</sup> , Ile <sup>A2</sup> , Val <sup>A3</sup> , Gln <sup>A5</sup>     | Gly <sup>A1</sup> , Tyr <sup>A19</sup>                     |
|                   |                                        | Cluster 2: Asn <sup>A18</sup> , Tyr <sup>A19</sup> , Cys <sup>A20</sup> , Asn <sup>A21</sup> |                                                            |
|                   |                                        | Cluster 3: Thr <sup>B27</sup> , Pro <sup>B28</sup> , Lys <sup>B29</sup>                      |                                                            |
| Pep <sub>13</sub> | -16.75                                 | Cluster 1: Gly <sup>A1</sup> , Ile <sup>A2</sup> , Glu <sup>A4</sup>                         | Gly <sup>A1</sup> , Glu <sup>A4</sup> , Tyr <sup>B26</sup> |
|                   |                                        | Cluster 2: Tyr <sup>A19</sup> , Cys <sup>A20</sup> , Asn <sup>A21</sup>                      |                                                            |
|                   |                                        | Cluster 3: Phe <sup>B25</sup> , Tyr <sup>B26</sup> , Thr <sup>B27</sup> , Lys <sup>B29</sup> |                                                            |

**Table S5.** Binding energy components of peptides with HI obtained from gmx\_mmpbsa of the MD simulation.

| Sample                                      | $\Delta G_{\text{gas}}$ (kJ mol <sup>-1</sup> )    |                                                     | $\Delta G_{\text{solv}}$ (kJ mol <sup>-1</sup> )     |                                                          | $\Delta G_{\text{total}}$<br>(kJ mol <sup>-1</sup> ) |
|---------------------------------------------|----------------------------------------------------|-----------------------------------------------------|------------------------------------------------------|----------------------------------------------------------|------------------------------------------------------|
|                                             | $\Delta E_{\text{VDW}}$<br>(kJ mol <sup>-1</sup> ) | $\Delta E_{\text{Elec}}$<br>(kJ mol <sup>-1</sup> ) | $\Delta E_{\text{polar}}$<br>(kJ mol <sup>-1</sup> ) | $\Delta E_{\text{non-polar}}$<br>(kJ mol <sup>-1</sup> ) |                                                      |
| <b>Pep<sub>7</sub></b><br><b>(ERRVDRR)</b>  | -74.81                                             | -1355.36                                            | 1338.46                                              | -16.48                                                   | -108.20                                              |
| <b>Pep<sub>13</sub></b><br><b>(EKKVDKK)</b> | -63.64                                             | -1078.22                                            | 1097.97                                              | -11.67                                                   | -55.61                                               |

**Table S6.** Quantitative morphometric analysis of HepG2 cells treated with native HI, HI+Pep<sub>7</sub>, HI+Pep<sub>13</sub>, and aggregated HI, using ImageJ. Data represent mean  $\pm$  SD for cell area and nuclear area.

| Sample                     | Cell area<br>( $\mu\text{m}^2$ ) | Nuclear area<br>( $\mu\text{m}^2$ ) |
|----------------------------|----------------------------------|-------------------------------------|
| <b>Native HI</b>           | 1665.2 $\pm$ 301.8               | 362.1 $\pm$ 52.3                    |
| <b>Aggregated HI</b>       | 379.43 $\pm$ 28.54               | 86 $\pm$ 12.8                       |
| <b>HI+Pep<sub>7</sub></b>  | 1904 $\pm$ 278.3                 | 400.8 $\pm$ 32.2                    |
| <b>HI+Pep<sub>13</sub></b> | 1521.7 $\pm$ 156.4               | 391.4 $\pm$ 77.5                    |
